# Supplementary material for: Gene Expression Profiling of Mediators Associated with the Inflammatory Pathways in the Intestinal Tissue from Patients with Ulcerative Colitis
Source: PubMed Central journal article supplement (PMC7201440; doi:10.1155/2020/9238970), 2020-01-18
Supplement: 9238970.f1.pdf [file 9238970.f1.pdf]

## Supplementary figures

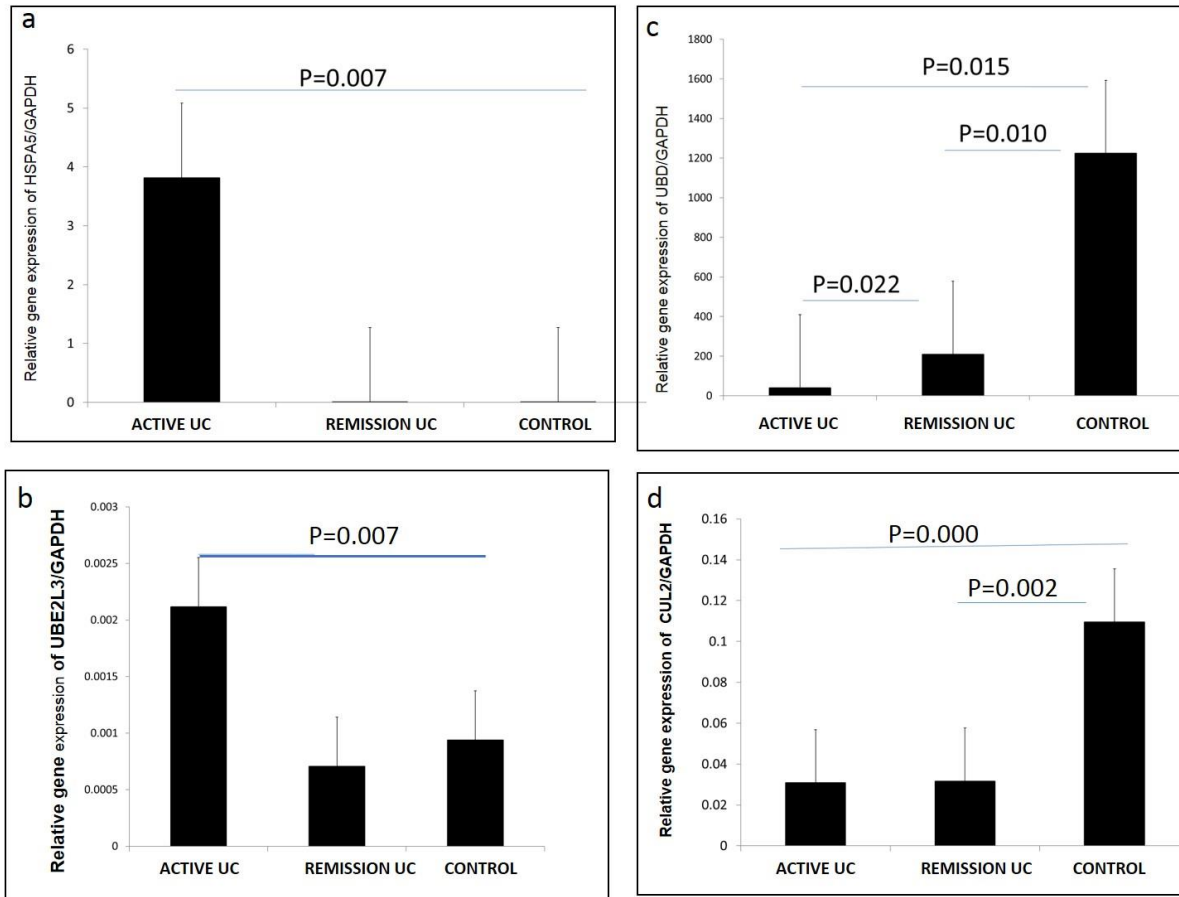

**Figure 1s.** Gene expression panel of ubiquitin ligases in colonic mucosa. Results were normalized using GAPDH as housekeeping gene. a) HSPA5, b) UBE2L3, c) UBD, d) CUL2 transcript levels and p values are presented in the figure.

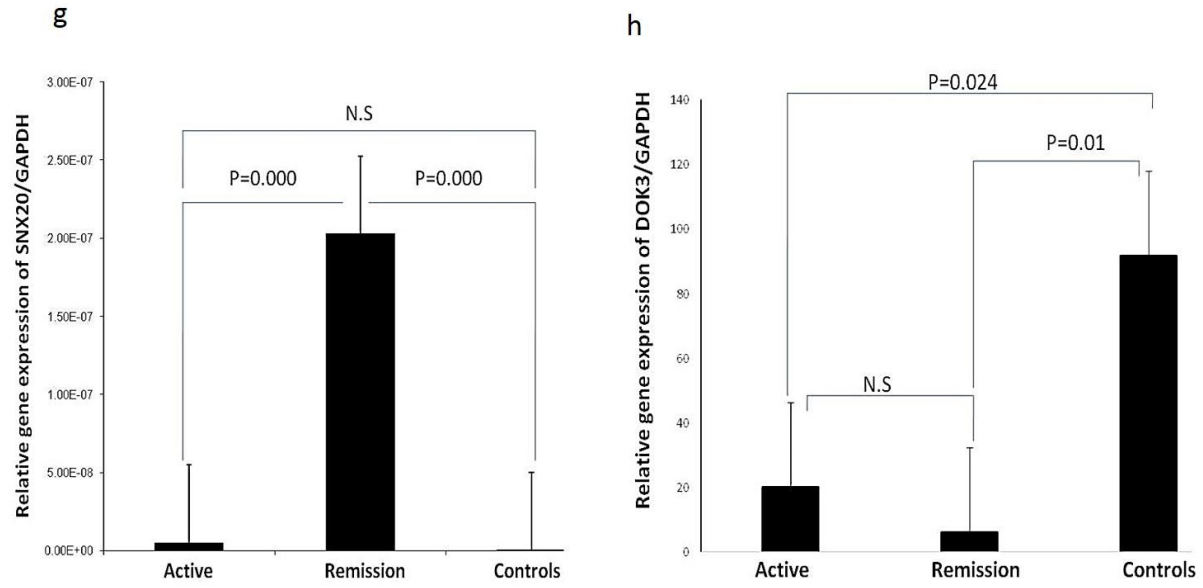

**Figure 2s. Gene expression panel of peripheral immune tolerance.** a) SNX20 and b) DOK3 transcript levels with GAPDH as housekeeping gene determined by  $2^{-\Delta\Delta Ct}$ , differences among groups were assessed by Kruskal Wallis test, and p values are presented in the figure.

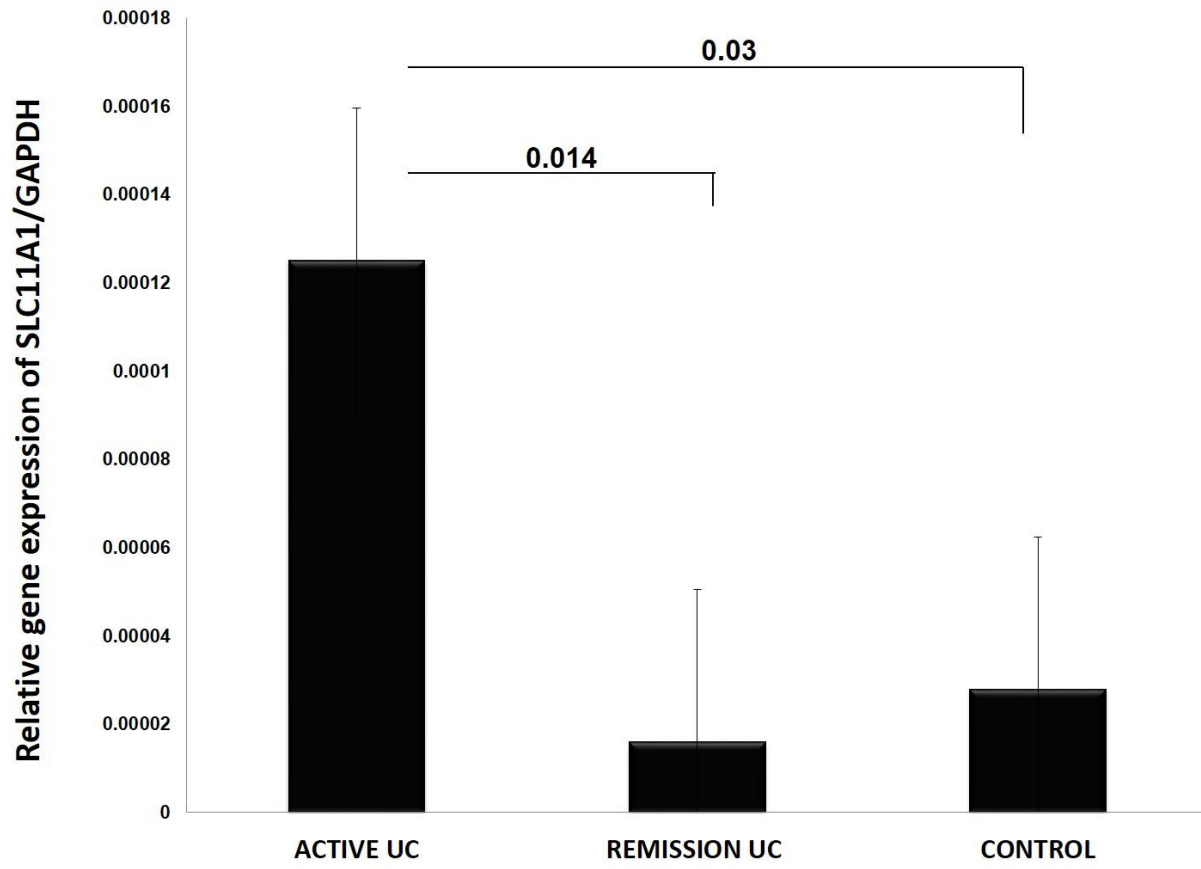

**Figure 3s Gene expression of SLC11A1 in colonic mucosa.** Results were normalized using GAPDH as housekeeping. transcript levels with GAPDH as housekeeping gene determined by  $2^{-\Delta\Delta Ct}$ , differences among groups were assessed by Kruskal Wallis test, and p values are presented in the figure.
